# Supplementary material for: The record low thermal conductivity of monolayer cuprous iodide (CuI) with a direct wide bandgap
Source: Royal Society of Chemistry journal article supplement (doi:10.1039/d2nr04408k), 2022-01-01
Supplement: d2nr04408k1.pdf [file d2nr04408k1.pdf]

*Supplementary Materials for*

**The record low thermal conductivity of monolayer Cuprous Iodide (CuI) with  
direct wide bandgap**

Jinyuan Xu<sup>1</sup>, Ailing Chen<sup>1</sup>, Linfeng Yu<sup>1</sup>, Donghai Wei<sup>1</sup>, Qikun Tian<sup>2</sup>, Huimin Wang<sup>3</sup>, Zhenzhen  
Qin<sup>2</sup>, and Guangzhao Qin<sup>1,\*</sup>

<sup>1</sup>*State Key Laboratory of Advanced Design and Manufacturing for Vehicle Body, College of Mechanical and  
Vehicle Engineering, Hunan University, Changsha 410082, P. R. China*

<sup>2</sup>*International Laboratory for Quantum Functional Materials of Henan School of Physics and Microelectronics,  
Zhengzhou University, Zhengzhou 450001, P. R. China*

<sup>3</sup>*Hunan Key Laboratory for Micro-Nano Energy Materials & Device and School of Physics and Optoelectronics,  
Xiangtan University, Xiangtan 411105, Hunan, P. R. China*

---

\* Correspondence author <gzqin@hnu.edu.cn>

## Note S1: High temperature stability

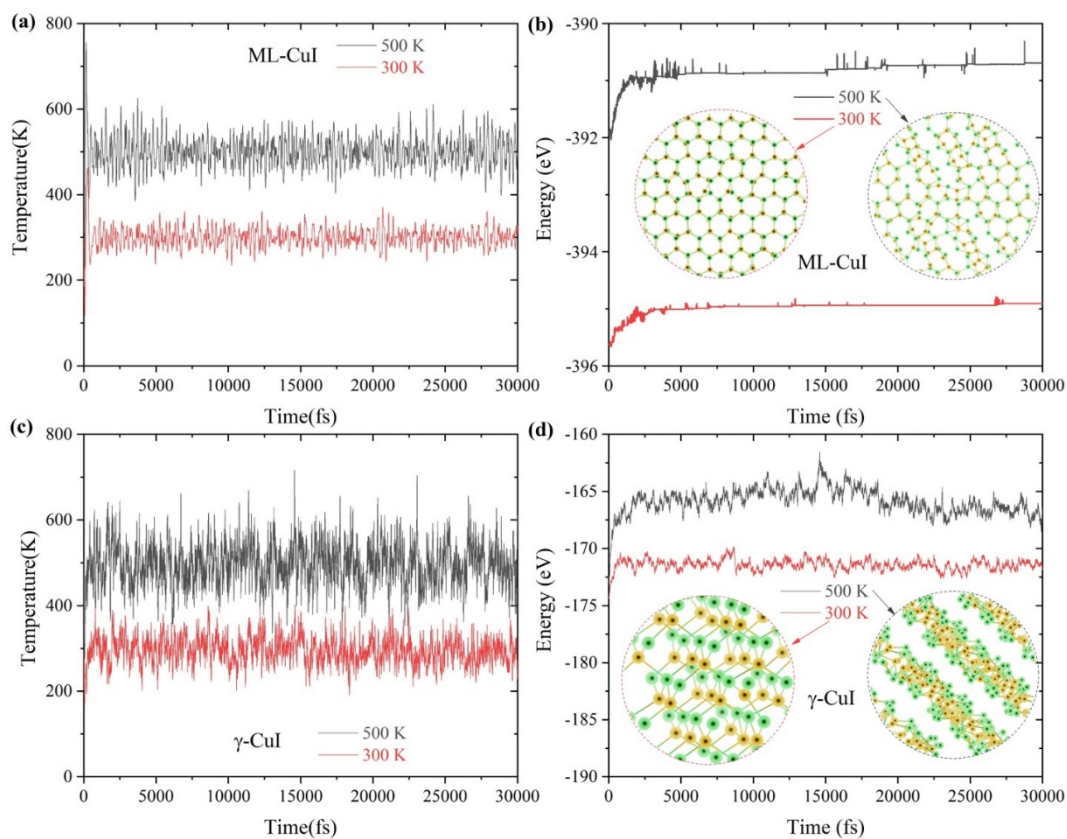

Figure. S1. AIMD simulations at 300 and 500 K for (a-b) monolayer CuI and (c-d)  $\gamma$ -CuI.

Considering that practical applications may contain operating conditions with different temperatures, the high temperature stability of monolayer CuI and  $\gamma$ -CuI is evaluated based on AIMD simulation. The AIMD simulation results at representative temperatures (300 and 500 K) are plotted in Figure S1. It is revealed that both the monolayer CuI and  $\gamma$ -CuI have excellent room temperature stability, while high temperatures may cause phase transitions.
